# Supplementary material for: Genome-Wide Characterization of CDPK Gene Family in Apple (Malus Domestica) and Its Transcriptional Expression During Apple Fruit Development
Source: Research Square preprint supplement (doi:10.21203/rs.3.rs-445130/v1), 2021-04-30
Supplement: Supplementary file 1 [file 44cf280afd380829234591b1.xlsx]

## Sheet: Sheet2
Table S1. Ka/Ks analysis for the CDPK gene pairs with collinearity relationship among the species examined.
Gene Pairs	Ks	Ka	Ka/Ks	Purifying selection
Pbr001308-Pbr010295	0.16122	0.02142	0.133	Yes
Pbr001322-Pbr010307	0.19463	0.05626	0.289	Yes
Pbr006943-Pbr017213	0.35598	0.03029	0.085	Yes
Pbr006943-Pbr011659	0.37665	0.02904	0.077	Yes
Pbr017213-Pbr011659	0.07382	0.00242	0.033	Yes
Pbr028878-Pbr021635	0.16887	0.00407	0.024	Yes
Pbr031892-Pbr039714	2.49151	0.18717	0.075	Yes
Pbr032128-Pbr023960	0.19208	0.02141	0.111	Yes
Pbr032128-Pbr033297	0.19904	0.02141	0.108	Yes
Pbr033297-Pbr023960	0.75272	0.03231	0.043	Yes
Pbr033416-Pbr033411	0.84211	0.0133	0.016	Yes
Pbr036114-Pbr011500	0.16931	0.02323	0.137	Yes
Pbr040137-Pbr018253	0.03301	0.00164	0.05	Yes
Prupe.4G021300-Prupe.4G213800	1.69074	0.15058	0.089	Yes
AT1G18890-AT1G74740	0.63408	0.07593	0.12	Yes
AT1G35670-AT4G09570	0.69585	0.02421	0.035	Yes
AT1G50700-AT3G20410	0.78841	0.07508	0.095	Yes
AT1G61950-AT4G21940	1.77594	0.28493	0.161	Yes
AT2G17290-AT4G35310	0.6732	0.05447	0.081	Yes
AT2G17890-AT4G36070	1.04087	0.12115	0.116	Yes
AT2G17890-AT5G66210	2.4785	0.13588	0.055	Yes
AT2G41860-AT3G57530	0.87643	0.10485	0.12	Yes
AT3G10660-AT5G04870	0.76767	0.08018	0.104	Yes
AT4G04695-AT4G21940	0.91164	0.21126	0.232	Yes
AT4G35310-AT4G38230	1.73611	0.10611	0.061	Yes
AT4G36070-AT5G66210	3.55433	0.17635	0.05	Yes
HF00526-Pbr027545	0.03881	0.00436	0.112	Yes
HF01706-Pbr011500	0.16244	0.02487	0.153	Yes
HF01706-Pbr036114	0.05815	0.00554	0.095	Yes
HF04060-Pbr006943	0.35729	0.03409	0.095	Yes
HF04060-Pbr011659	0.10689	0.00768	0.072	Yes
HF04060-Pbr017213	0.11016	0.0085	0.077	Yes
HF04323-Pbr039714	0.05068	0.01196	0.236	Yes
HF05458-Pbr001308	0.06434	0.01142	0.178	Yes
HF05458-Pbr010295	0.15207	0.02593	0.171	Yes
HF05471-Pbr001322	0.04935	0.01717	0.348	Yes
HF05471-Pbr010307	0.20555	0.04488	0.218	Yes
HF06540-Pbr033365	0.07513	0.01811	0.241	Yes
HF09216-Pbr011500	0.05214	0.00712	0.137	Yes
HF09216-Pbr036114	0.16304	0.0224	0.137	Yes
HF10630-Pbr023960	0.05663	0.00681	0.12	Yes
HF10630-Pbr032128	0.35213	0.11183	0.318	Yes
HF10630-Pbr033297	0.1599	0.11372	0.711	Yes
HF13801-Pbr006943	0.1129	0.01132	0.1	Yes
HF13801-Pbr011659	0.31927	0.02911	0.091	Yes
HF13801-Pbr017213	0.32802	0.02827	0.086	Yes
HF14253-Pbr033365	0.11572	0.02822	0.244	Yes
HF15429-Pbr021635	0.09372	0.07038	0.751	Yes
HF15429-Pbr028878	0.18691	0.00407	0.022	Yes
HF17744-Pbr031892	0.07062	0.01113	0.158	Yes
HF20170-Pbr001322	0.17702	0.05625	0.318	Yes
HF20170-Pbr010307	0.07948	0.0087	0.109	Yes
HF20185-Pbr001308	2.50643	0.75605	0.302	Yes
HF20185-Pbr010295	0.05206	0.01636	0.314	Yes
HF28950-Pbr033416	0.10306	0.04489	0.436	Yes
HF36202-Pbr023960	0.18784	0.03171	0.169	Yes
HF36202-Pbr032128	0.0692	0.01805	0.261	Yes
HF36202-Pbr033297	0.19475	0.0317	0.163	Yes
HF39191-Pbr018253	0.06321	0.00343	0.054	Yes
HF39191-Pbr040137	0.06652	0.00343	0.052	Yes
HF39491-Pbr018253	0.18314	0.02379	0.13	Yes
HF39491-Pbr040137	0.05999	0.01417	0.236	Yes
gene05409-HF00526	0.95271	0.07027	0.074	Yes
gene09567-HF01706	0.66377	0.04273	0.064	Yes
gene09567-HF09216	0.70379	0.05028	0.071	Yes
gene13451-HF15429	0.61653	0.03125	0.051	Yes
gene14687-HF04060	0.78995	0.0791	0.1	Yes
gene14687-HF13801	0.82994	0.05872	0.071	Yes
gene15357-HF03960	0.85304	0.05384	0.063	Yes
gene15357-HF13700	0.8854	0.06675	0.075	Yes
gene17341-HF10630	0.5717	0.12726	0.223	Yes
gene17341-HF36202	0.52172	0.06601	0.127	Yes
gene18135-HF05458	0.57124	0.09074	0.159	Yes
gene18135-HF20185	0.65362	0.10075	0.154	Yes
gene18254-HF05471	0.60764	0.10874	0.179	Yes
gene18254-HF20170	0.59484	0.10161	0.171	Yes
gene19615-HF04323	1.77887	0.21607	0.121	Yes
gene19615-HF17744	0.78092	0.13501	0.173	Yes
gene23668-HF06540	0.60252	0.04136	0.069	Yes
gene23668-HF14253	0.60359	0.04993	0.083	Yes
gene25220-HF05266	0.59905	0.07373	0.123	Yes
gene27440-HF39191	1.12962	0.06639	0.059	Yes
gene27440-HF39491	1.10023	0.06475	0.059	Yes
HF00526-Prupe.3G035400	1.71462	0.1385	0.081	Yes
HF01706-Prupe.5G184800	0.40258	0.02918	0.072	Yes
HF03960-Prupe.4G263600	0.42997	0.04208	0.098	Yes
HF04060-Prupe.4G250200	0.44451	0.03791	0.085	Yes
HF04323-Prupe.4G021300	2.15916	0.17508	0.081	Yes
HF04323-Prupe.4G213800	0.50646	0.05109	0.101	Yes
HF05266-Prupe.7G064300	2.21071	0.43751	0.198	Yes
HF05458-Prupe.7G089600	0.32422	0.04551	0.14	Yes
HF05471-Prupe.7G090800	0.38984	0.06659	0.171	Yes
HF06540-Prupe.2G075100	0.2466	0.02313	0.094	Yes
HF09216-Prupe.5G184800	0.42108	0.03494	0.083	Yes
HF10630-Prupe.8G180800	0.42772	0.11665	0.273	Yes
HF13700-Prupe.4G263600	0.4226	0.05352	0.127	Yes
HF13801-Prupe.4G250200	0.45322	0.02991	0.066	Yes
HF14253-Prupe.2G075100	0.31971	0.02698	0.084	Yes
HF15429-Prupe.6G278500	0.32707	0.01147	0.035	Yes
HF17744-Prupe.4G021300	0.75095	0.06868	0.091	Yes
HF17744-Prupe.4G213800	2.5166	0.15903	0.063	Yes
HF20170-Prupe.2G075100	1.2973	0.14005	0.108	Yes
HF20170-Prupe.7G090800	0.38795	0.06153	0.159	Yes
HF20185-Prupe.7G089600	0.33899	0.05303	0.156	Yes
HF28950-Prupe.3G035400	1.98937	0.07422	0.037	Yes
HF36202-Prupe.8G180800	0.27329	0.0396	0.145	Yes
HF39191-Prupe.8G057600	0.44406	0.04327	0.097	Yes
HF39491-Prupe.8G057600	0.41358	0.03829	0.093	Yes
AT1G18890-Pbr011500	1.80045	0.11497	0.064	Yes
AT1G18890-Pbr036114	2.77368	0.11852	0.043	Yes
AT1G50700-Pbr039714	1.81024	0.16701	0.092	Yes
AT1G61950-Pbr031892	1.84932	0.23426	127	Yes
AT1G74740-Pbr011500	2.76655	0.73864	0.267	Yes
AT2G17290-Pbr023960	1.63974	0.10035	0.061	Yes
AT2G17290-Pbr032128	2.05191	0.09565	0.047	Yes
AT2G17290-Pbr033297	3.05528	0.12404	0.041	Yes
AT2G35890-Pbr001322	1.75891	0.31518	0.179	Yes
AT2G35890-Pbr010307	2.2443	0.29641	0.132	Yes
AT3G51850-Pbr021635	1.73724	0.3612	0.208	Yes
AT3G57530-Pbr023408	2.7745	0.32514	0.117	Yes
AT4G04695-Pbr031892	1.77433	0.25067	0.141	Yes
AT4G21940-Pbr031892	1.75818	0.20654	0.117	Yes
AT4G23650-Pbr024654	2.0569	0.10816	0.053	Yes
AT4G35310-Pbr023960	1.76479	0.10819	0.061	Yes
AT4G35310-Pbr032128	2.00909	0.10586	0.053	Yes
AT4G35310-Pbr033297	1.77122	0.10816	0.061	Yes
AT5G12480-Pbr017213	2.05615	0.13027	0.063	Yes
AT1G18890-gene09567	1.77619	0.10824	0.061	Yes
AT1G61950-gene19615	2.79278	0.27995	0.102	Yes
AT1G74740-gene09567	2.96562	0.11111	0.037	Yes
AT1G76040-gene08576	2.75423	0.18215	0.066	Yes
AT2G17290-gene17341	1.31857	0.09886	0.075	Yes
AT2G35890-gene18254	3.11508	0.31172	0.101	Yes
AT2G41860-gene25220	1.93965	0.16139	0.083	Yes
AT3G51850-gene13451	3.50466	0.08004	0.023	Yes
AT3G57530-gene25220	1.53053	0.13641	0.089	Yes
AT4G04695-gene19615	2.38829	0.30208	0.126	Yes
AT4G21940-gene19615	2.8577	0.25379	0.089	Yes
AT4G35310-gene17341	1.39628	0.10329	0.074	Yes
AT4G38230-gene17341	1.99685	0.11259	0.056	Yes
AT1G18890-Prupe.5G184800	1.75266	0.11112	0.148	Yes
AT1G61950-Prupe.4G021300	2.50817	0.12469	0.05	Yes
AT1G74740-Prupe.5G184800	2.14891	0.11509	0.054	Yes
AT1G76040-Prupe.1G360100	1.76405	0.18976	0.108	Yes
AT2G17290-Prupe.8G180800	1.66881	0.09377	0.056	Yes
AT2G35890-Prupe.7G090800	2.61509	0.31144	0.119	Yes
AT2G41860-Prupe.7G064300	2.34932	0.16213	0.069	Yes
AT3G51850-Prupe.6G278500	2.11974	0.07105	0.034	Yes
AT3G57530-Prupe.7G064300	2.10726	0.13833	0.066	Yes
AT4G04695-Prupe.4G021300	1.73731	0.25463	0.147	Yes
AT4G21940-Prupe.4G021300	2.88301	0.20366	0.071	Yes
AT4G21940-Prupe.4G213800	1.75645	0.20444	0.116	Yes
AT4G23650-Prupe.5G110500	2.66371	0.18276	0.069	Yes
AT4G35310-Prupe.8G180800	1.81887	0.10182	0.056	Yes
AT4G38230-Prupe.8G180800	1.83241	0.11216	0.061	Yes
AT5G04870-Prupe.2G075100	2.37	0.10224	0.043	Yes
AT5G19360-Prupe.4G263600	1.75174	0.12228	0.069	Yes
gene05409-Pbr027545	0.93303	0.06921	0.074	Yes
gene05409-Pbr033416	0.89504	0.0771	0.086	Yes
gene09567-Pbr011500	0.68805	0.0485	0.07	Yes
gene09567-Pbr036114	0.69748	0.04273	0.061	Yes
gene13451-Pbr021635	0.62987	0.03125	0.05	Yes
gene13451-Pbr028878	0.64605	0.02959	0.046	Yes
gene14687-Pbr006943	0.82883	0.07377	0.089	Yes
gene14687-Pbr011659	0.72245	0.06631	0.092	Yes
gene14687-Pbr017213	0.78401	0.06631	0.085	Yes
gene17341-Pbr023960	0.49028	0.05697	0.116	Yes
gene17341-Pbr032128	0.52727	0.05788	0.11	Yes
gene17341-Pbr033297	0.49088	0.05696	0.116	Yes
gene18135-Pbr001308	0.61456	0.08816	0.143	Yes
gene18135-Pbr010295	0.61331	0.09834	0.16	Yes
gene18254-Pbr001322	0.59948	0.1168	0.195	Yes
gene18254-Pbr010307	0.57847	0.10397	0.18	Yes
gene19615-Pbr031892	0.82632	0.13548	0.164	Yes
gene23668-Pbr033365	0.58174	0.05633	0.097	Yes
gene25220-Pbr023408	1.6385	0.21694	0.132	Yes
Pbr001308-Prupe.7G089600	0.33309	0.04127	0.124	Yes
Pbr001322-Prupe.7G090800	0.38174	0.07596	0.199	Yes
Pbr006943-Prupe.4G250200	0.4697	0.03137	0.067	Yes
Pbr010295-Prupe.7G089600	0.32944	0.04667	0.142	Yes
Pbr010307-Prupe.7G090800	0.41136	0.06155	0.15	Yes
Pbr011500-Prupe.5G184800	3.23215	0.4741	0.147	Yes
Pbr011659-Prupe.4G250200	0.4263	0.04114	0.097	Yes
Pbr017213-Prupe.4G250200	0.45179	0.04029	0.089	Yes
Pbr018253-Prupe.8G057600	0.44546	0.04508	0.101	Yes
Pbr021635-Prupe.6G278500	0.32277	0.01147	0.036	Yes
Pbr023408-Prupe.7G064300	0.79171	0.21389	0.271	Yes
Pbr023960-Prupe.8G180800	0.27898	0.02642	0.095	Yes
Pbr024654-Prupe.5G110500	0.30565	0.03816	0.125	Yes
Pbr027545-Prupe.3G035400	1.23621	0.04258	0.034	Yes
Pbr028878-Prupe.6G278500	0.36154	0.00983	0.027	Yes
Pbr031892-Prupe.4G021300	0.46563	0.0365	0.078	Yes
Pbr031892-Prupe.4G213800	0.80661	0.31562	0.391	Yes
Pbr032128-Prupe.8G180800	0.25399	0.03037	0.12	Yes
Pbr033297-Prupe.8G180800	0.27927	0.02642	0.095	Yes
Pbr033365-Prupe.2G075100	0.26985	0.04098	0.152	Yes
Pbr036114-Prupe.5G184800	2.42982	0.43583	0.179	Yes
Pbr039714-Prupe.4G021300	2.04372	0.17712	0.087	Yes
Pbr039714-Prupe.4G213800	0.52385	0.06378	0.122	Yes
Pbr040137-Prupe.8G057600	0.45666	0.04508	0.099	Yes
gene05409-Prupe.3G035400	0.7041	0.05738	0.081	Yes
gene08576-Prupe.1G360100	0.72618	0.09852	0.136	Yes
gene09567-Prupe.5G184800	0.55171	0.03605	0.065	Yes
gene13451-Prupe.6G278500	0.50023	0.02356	0.047	Yes
gene14687-Prupe.4G250200	0.61616	0.05849	0.095	Yes
gene15357-Prupe.4G263600	0.78774	0.05829	0.074	Yes
gene17341-Prupe.8G180800	0.3853	0.05177	0.134	Yes
gene18135-Prupe.7G089600	0.58558	0.07829	0.134	Yes
gene18254-Prupe.7G090800	0.4862	0.09652	0.199	Yes
gene19615-Prupe.4G021300	0.80507	0.13356	0.166	Yes
gene19615-Prupe.4G213800	1.88592	0.20946	0.111	Yes
gene23668-Prupe.2G075100	0.60853	0.03294	0.054	Yes
gene25220-Prupe.7G064300	0.48979	0.06694	0.137	Yes
